# Supplementary material for: Anti-Staphylococcal Biofilm Effects of a Liposome-Based Formulation Containing Citrus Polyphenols
Source: MDPI journal article supplement (doi:10.3390/antibiotics13040318), 2024-03-30
Supplement: s1 [file s1]

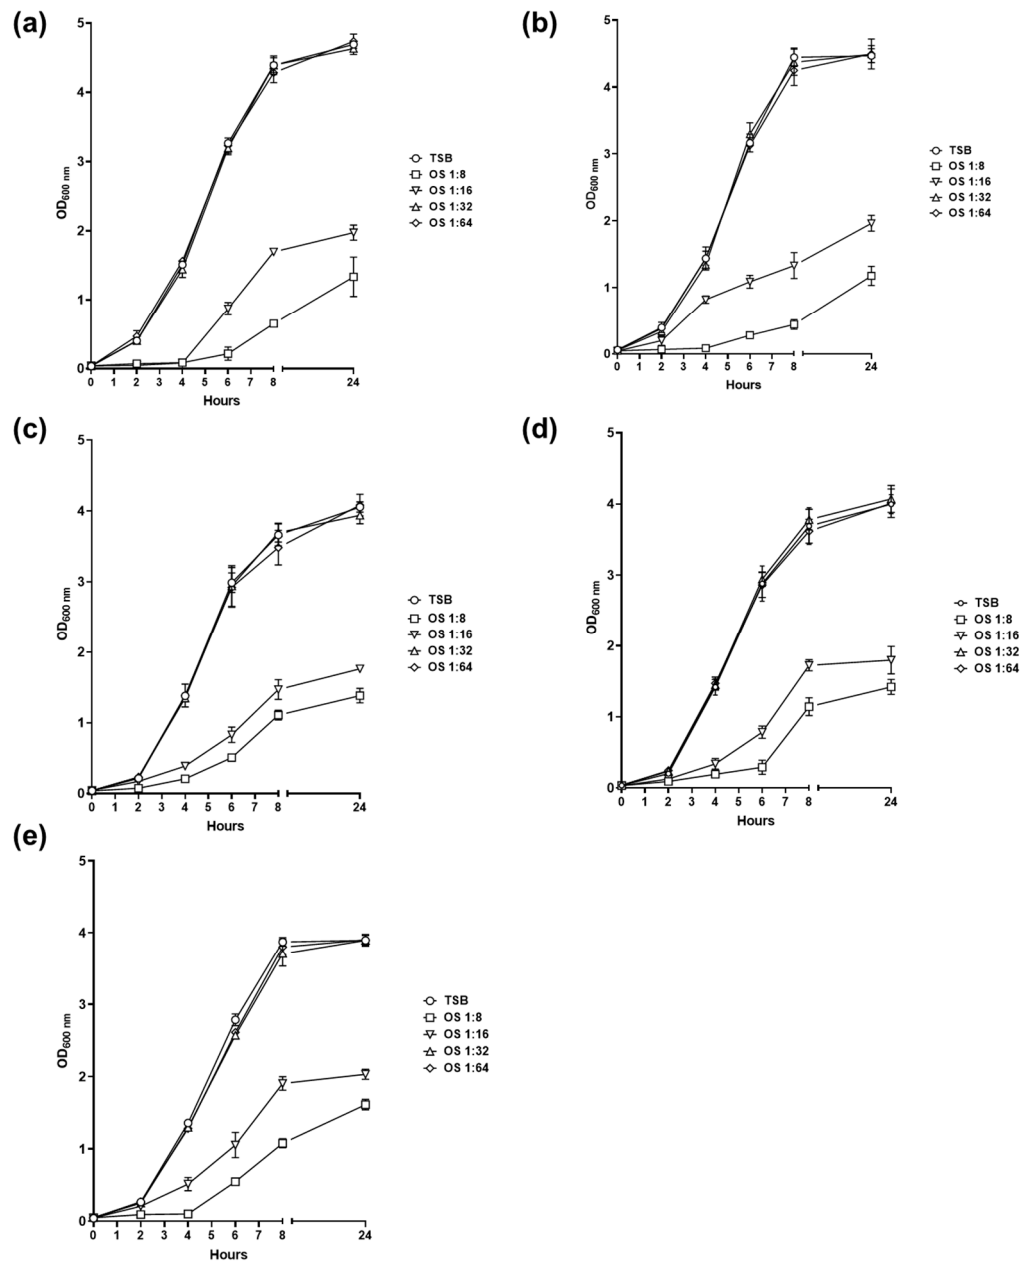

**Figure S1.** Staphylococcal growth in the presence of sub-inhibitory OS concentrations. Effect of sub-inhibitory OS concentrations (product dilution 1:8, 1:16, 1:32, and 1:64) on the growth of *S. aureus* ATCC 6538 (a), *S. aureus* ATCC 43300 (b), *S. epidermidis* ATCC 35984 (c), *S. epidermidis* CI-1 (d), and *S. epidermidis* CI-2 (e). For each strain, growth in TSB without OS was monitored as control.

**Table S1.** Effect of levofloxacin on mature biofilm biomass. Values (OD<sub>570 nm</sub>) are expressed as the mean  $\pm$  standard deviation.

| Levofloxacin<br>concentration<br>( $\mu\text{g/mL}$ ) | <i>S. aureus</i><br>ATCC 6538 | <i>S. aureus</i><br>ATCC 43300 | <i>S. epidermidis</i><br>ATCC 35984 | <i>S. epidermidis</i><br>CI-1 |
|-------------------------------------------------------|-------------------------------|--------------------------------|-------------------------------------|-------------------------------|
| 0 <sup>a</sup>                                        | 1.763 $\pm$ 0.220             | 1.474 $\pm$ 0.133              | 4.850 $\pm$ 0.125                   | 0.815 $\pm$ 0.078             |
| 0.5                                                   | 1.424 $\pm$ 0.149             | 1.312 $\pm$ 0.150              | 4.303 $\pm$ 0.272                   | 0.755 $\pm$ 0.051             |
| 1                                                     | 1.260 $\pm$ 0.111             | 1.310 $\pm$ 0.188              | 4.259 $\pm$ 0.341                   | 0.694 $\pm$ 0.038             |
| 2                                                     | 1.193 $\pm$ 0.164             | 1.294 $\pm$ 0.155              | 4.242 $\pm$ 0.115                   | 0.664 $\pm$ 0.063             |
| 4                                                     | 1.129 $\pm$ 0.218             | 1.072 $\pm$ 0.155              | 4.217 $\pm$ 0.291                   | 0.639 $\pm$ 0.045             |
| 8                                                     | 1.029 $\pm$ 0.155             | 1.044 $\pm$ 0.070              | 4.200 $\pm$ 0.226                   | 0.622 $\pm$ 0.056             |
| 16                                                    | 0.982 $\pm$ 0.079             | 0.978 $\pm$ 0.039              | 3.987 $\pm$ 0.206                   | 0.609 $\pm$ 0.019             |
| 32                                                    | 0.925 $\pm$ 0.089             | 0.967 $\pm$ 0.085              | 3.984 $\pm$ 0.051                   | 0.533 $\pm$ 0.084             |
| 64                                                    | 0.822 $\pm$ 0.030             | 0.944 $\pm$ 0.041              | 3.941 $\pm$ 0.089                   | 0.529 $\pm$ 0.093             |
| 128                                                   | 0.792 $\pm$ 0.122             | 0.949 $\pm$ 0.078              | 3.648 $\pm$ 0.649                   | 0.524 $\pm$ 0.043             |
| 256                                                   | 0.062 $\pm$ 0.020             | 0.924 $\pm$ 0.036              | 2.621 $\pm$ 0.136                   | 0.500 $\pm$ 0.056             |
| 512                                                   | 0.026 $\pm$ 0.008             | 0.920 $\pm$ 0.057              | 1.655 $\pm$ 0.223                   | 0.435 $\pm$ 0.032             |

<sup>a</sup>TSB control.

**Table S2.** Quantification of biofilm-embedded cells (plate count and CLSM analysis) and of DAPI intensity emitted by cells (CLSM analysis). Data are expressed as the mean  $\pm$  standard deviation.

| Bacterial strain                 | Plate count<br>(CFU/mL)      |                             | Cells count by CLSM<br>(cell/well) |                             | Intensity of DAPI emitted by<br>cells (CLSM) |                             |
|----------------------------------|------------------------------|-----------------------------|------------------------------------|-----------------------------|----------------------------------------------|-----------------------------|
|                                  | Control TSB                  | OS                          | Control TSB                        | OS                          | Control TSB                                  | OS                          |
| <i>S. aureus</i> ATCC 6538       | $4.13 \pm 0.072 \times 10^7$ | $4.26 \pm 0.40 \times 10^7$ | $2.78 \pm 0.86 \times 10^7$        | $3.48 \pm 0.31 \times 10^7$ | $8.67 \pm 2.64 \times 10^4$                  | $4.32 \pm 3.03 \times 10^4$ |
| <i>S. aureus</i> ATCC 43300      | $4.80 \pm 0.91 \times 10^7$  | $3.98 \pm 0.66 \times 10^7$ | $3.14 \pm 0.15 \times 10^7$        | $3.50 \pm 0.18 \times 10^7$ | $3.66 \pm 1.64 \times 10^4$                  | $2.55 \pm 0.34 \times 10^4$ |
| <i>S. epidermidis</i> ATCC 35984 | $5.53 \pm 0.68 \times 10^7$  | $5.24 \pm 0.34 \times 10^7$ | $3.62 \pm 0.41 \times 10^7$        | $2.28 \pm 0.76 \times 10^7$ | $7.15 \pm 1.06 \times 10^5$                  | $4.82 \pm 1.22 \times 10^5$ |
| <i>S. epidermidis</i> CI-1       | $5.53 \pm 0.65 \times 10^7$  | $4.35 \pm 0.91 \times 10^7$ | $3.32 \pm 0.41 \times 10^7$        | $3.36 \pm 0.23 \times 10^7$ | $2.91 \pm 1.18 \times 10^4$                  | $3.69 \pm 0.88 \times 10^3$ |
| <i>S. epidermidis</i> CI-2       | $1.85 \pm 0.42 \times 10^7$  | $1.59 \pm 0.25 \times 10^7$ | $3.30 \pm 0.077 \times 10^7$       | $3.57 \pm 0.79 \times 10^7$ | $2.32 \pm 0.49 \times 10^4$                  | $3.03 \pm 0.61 \times 10^4$ |
